# Supplementary material
Source: Springer Nature journal article supplement (https://www.springermedizin.de/resource/supplementary/13012_2013_670_MOESM1_ESM.pdf/9630494)
Supplement: MOESM1 [file 9630494]

**Additional file 1:** Clinical Practice Guidelines developed within the framework of the Clinical Practice Guidelines Development Programme of the Spanish Ministry of Health between 2008 and 2009

|           | <b>Clinical Practice Guideline</b>                                                                       | <b>Abbreviation</b>         | <b>Development Agency</b>   | <b>Edition</b> | <b>Topic</b>               | <b>Languages<sup>a</sup></b> |
|-----------|----------------------------------------------------------------------------------------------------------|-----------------------------|-----------------------------|----------------|----------------------------|------------------------------|
| <b>1</b>  | Clinical Practice Guideline for Treatment of Patients with Anxiety Disorders in Primary Care             | Anxiety 2008                | Agencia Laín Entralgo       | 2008           | Mental health              | Spanish and English version  |
| <b>2</b>  | Clinical Practice Guideline on the Management of Patients with Autism Spectrum Disorders in Primary Care | Autism 2009                 | Agencia Laín Entralgo       | 2009           | Mental health              | Spanish version              |
| <b>3</b>  | Clinical Practice Guideline on the Management of Major Depression in Adults                              | Depression Adult 2008       | Avalia-t                    | 2008           | Mental health              | Spanish and English version  |
| <b>4</b>  | Clinical Practice Guideline on Major Depression in Childhood and Adolescence                             | Depression Childhood 2009   | Avalia-t                    | 2009           | Mental health              | Spanish and English version  |
| <b>5</b>  | Clinical Practice Guideline on Type II Diabetes                                                          | Diabetes II 2008            | Osteba                      | 2008           | Metabolic disease          | Spanish version              |
| <b>6</b>  | Clinical Practice Guideline for Eating Disorders                                                         | Eating Disorders 2009       | AIAQS                       | 2009           | Mental health              | Spanish and English version  |
| <b>7</b>  | Clinical Practice Guideline on the Management of Patients with Insomnia in Primary Care                  | Insomnia 2009               | Agencia Laín Entralgo       | 2009           | Mental health              | Spanish version              |
| <b>8</b>  | Clinical Practice Guideline on Prevention and Treatment of Obesity in Childhood and Adolescence          | Obesity 2009                | AIAQS CClb                  | 2009           | Metabolic disease          | Spanish and English version  |
| <b>9</b>  | Clinical Practice Guideline on Palliative Care                                                           | Palliative Care 2008        | Osteba                      | 2008           | Cancer and palliative care | Spanish version              |
| <b>10</b> | Clinical Practice Guideline for Prostate Cancer Treatment                                                | Prostate Cancer 2008        | I+CS                        | 2008           | Cancer and palliative care | Spanish and English version  |
| <b>11</b> | Clinical Practice Guideline for Schizophrenia and Incipient Psychotic Disorder                           | Schizophrenia 2009          | AIAQS Fòrum de Salut Mental | 2009           | Mental health              | Spanish and English version  |
| <b>12</b> | Clinical Practice Guideline for Psychosocial Interventions in Severe Mental Disorder                     | Severe Mental Disorder 2009 | I+CS                        | 2009           | Mental health              | Spanish version              |
| <b>13</b> | Clinical Practice Guideline on the Management of Patients With Stroke in Primary Care                    | Stroke 2009                 | Agencia Laín Entralgo       | 2009           | Cardiovascular disease     | Spanish version              |
| <b>14</b> | Clinical Practice Guideline for Primary and Secondary Prevention of Stroke                               | Stroke Prevention 2009      | AIAQS CClb                  | 2009           | Cardiovascular disease     | Spanish and English version  |

Abbreviations: AIAQS: Agència d'Informació, Avaluació i Qualitat en salut, Catalunya; Agencia Laín Entralgo: Unidad de Evaluación de Tecnologías Sanitarias de la Agencia Laín Entralgo de la Comunidad de Madrid; Avalia-t: Axencia de Avaliación de Tecnologías Sanitarias de Galicia; CClb: Centro Cochrane Iberoamericano; I+CS: Instituto Aragonés de Ciencias de la Salud; Osteba: Agencia de Evaluación de Tecnologías Sanitarias del País Vasco

<sup>a</sup>Published versions in GuiaSalud in March 2011.
